# Supplementary material
Source: PubMed Central journal article supplement (PMC3811562)

Supplemental figures

Predicted RNA/mRNA Sequence for PF3D7\_1305500:

**TTAA** is *piggyBac* insertion site where CDS is disrupted is underlined. Data source: PlasmoDB ver. 9.3.

Green shading is RHD domain;

Red shading is the DUSP domain.

```
ATGGAATATAAAAGCATCGATTTTGAGGAGCTGAAAAAAGTAAGAGAGGAAAAACAAGCGAAAAAATAATGAAAAACAACAAAGTAGCAAAAATGAAAATTATGTAGAACTATTG 120
M E Y K S I D F E E L K K K V R E E K T S E K N N E N K Q S S K N E N Y V E L L>

AGAGATCAAGTAAATGGAAAATATTTGAAAGAAGCTTAATAATGATACTAATAACAAAAAGGATGTTTTACCCCTCCCTTAATTAAAAAATAACATAACCTGTAATAATAAATTCATTTTAT 240
R D Q V N G K Y L K E L N N D T N N K K D V L P S S L K N N I T C K I I N S F Y>

ATTTATAATTACATACAACTATTATTAATGAAGGAAGTAACAAAAGTGATACATATTAGATATTCGAAAAGAAGATTATTTAACCAGGGTCATATTAAGAGTAGTATTAATATATAT 360
I Y N Y I Q L L L N E G S N K S V Y I L D I R K E D L F N Q G H I K S S I N I Y>

AATAAAAAGATGATGATACAAATAAATAAAGAAATGATATGTAAGACAATTTAAAAATTATCTTTTATGATCAGAATAAATGAATAATATATATGATGATTGTATTAATTTATATAAT 480
N K K M M I Q I N K E M I C K D N L K I I F Y D Q N N M N N I Y D D C I N L Y N>

GTCTATTTTCAAATATTAAGTAGAGAACATATACATTTTAAAGGAGGATATGAAGATTTTGAAAGAGAATATTGTTTCTTGTGTATTTATAAAAAATGTTGATGTAAGGACAAAT 600
V Y F S N I K V E N I Y I L K G G Y E D F E R E E Y C F L C I Y K N V D V K G Q I>

TCTCACATATTTATAATAGTAGTGCATATATAAATTATCCTATAAAAAATGTTGATAACTTATATTTAGGAAACATTATTTCATATAAATAATATTTTATAAATGATTTTGAACATC 720
S S H I Y N S S A Y I N Y P I K M F D N L Y L G N I I H I N N I F I N D F L N I>

AAATATATTTATGATTTTACATCAACTGGTTTTGTTATAAAAAACAGAAAATAAAGAAACAAGGAAAAATAAGGAACTTTATATTTTAGATATAATGTATATACTAAAAATTTGAAAAAT 840
K Y I Y D F T S T G F V I K T E N K E T R K N K E L L Y F R Y N V Y T K N F E N>

ACAAATTCTTGAATAATGAATCTATTAATTATTACAATTTTTTAGATATACATATGATATATAAAGTTATTACTTCTATGATAAGTACAAATCAAAATGATATATCTCATAATAATAAT 960
T N S L N N E S I N Y Y N F L D I H M I Y K V I T S M I S T N Q N D I S H N N N>

AATAATGATGATGATGATGTAATATATAATGATCAGAATAAATAATATGGCTTTATGTACAAACCAAGTAAAGATAAATAACATCATTTATAAAACAAAATAAAGAACAGTTAATATGT 1080
N N D D D D V I Y N D Q N N N M A L C T N Q V K D N N T S F I K Q N K E Q L I C>

TATATAAATTCTACACATAATAACAAAAACAAAATATGAATAATCAAAATAATATCCTTATTTATATGTAATCATGGAATGAAAAATCCTACATCAGAAAAACAAATAGTATAAGTCTT 1200
Y I N S T H N N K K Q N M N N Q N N I L I I C N H G M K N P T S E K T N S I S L>

ATTATATGTATGTGTTATATTATGATATAAAAAAATAAACCTAATTTAATTTATGCCTATATGCTAAAAATATATAAATACTGGAGTATAAAATCCTCAGACAAAATCATTTTAGAA 1320
I I C M C Y I M Y I K K Y N P N L I I A Y M L K I Y N N W S I N S Q T K S F L E>

AGTTTCTATCAATCCCTAATTAAGTGAATTATAATTTATCAAAATATATTCAAAAAATATATATGTTATAATAAAGAGGAACATATAAATATTTCAACAGATAATCATAATCAAACG 1440
S F Y Q S L I K C N Y N L S K Y Y S K K Y I C Y N K E E H I N I S T D N H N Q T>

GAATCACTATTAATATTATAACAAGTGATAATTATAGGAAATTTATTTGATAAATACGAATTAATAAAAAATATATATATTTTACAGTATGATGAAAAATATGTACTAAATATCAAACAA 1560
```

E S L L N I I T S D N Y R K L F D K Y E L N K N Y I Y L Q Y D E K Y V L N I K Q>  
GAACATATAATATTAGATATAAATAAATAAAAACAACAATAAATGACCAGGATATAACAATATCTTATGAATATGTAAATAATGTCCATCTTATTTTATTTTATAATATTACAACAATA 1680  
E H I I L D I N I I K Q Q I N D Q D I T I S Y E Y V I M S I L F Y F Y N I T T I>  
AATTATGAACATATTAATGAAGTCTTACAAATTATTACACATATACTAAATAAGAAACAAAATTATCATCAGCTTTATTTAATAGTTCCTTACATATCATTAAATCATAATAAATATATGT 1800  
N Y E H I N E V L Q I I T H I L N K K Q N Y H Q L Y L I V P Y I S L I I I N I C>  
AAAATATTAACATACAACACAATGAAAACAATAGTATTAACAATACAATTTAGAAAATCATGACAATGTAAAATATACTTTATTTTCATCTAATATATAAAAAATATTATTATATGTATT 1920  
K I L T Y N T I E N N S I N N T N L E N H D N V K Y T L F H L I Y K N I I I C I>  
GATATATTAATAAATAATGATGATATATCTAATCATATAATTAATGAAGAATTTGATGTTACATGTTTAAACAACCAGGCTATATAAAAAATAAAAAATATTGATAAAAAATTTTATATA 2040  
D I L I N N D D I S N H I I N E E F D V T C L T N Q V Y I K N K N I D K K F Y I>  
ATATTATATCATTAATAATTTTCTTATAACACTTTTGCATTTATATCTTAATCCACACATAACAATAACGAAATTTTAACTGTAGATAAAAAATATTCTATCTATTGAAAAAATTTGAT 2160  
I L L S L K Y F L I T L L H L Y L N P H I T N T K F L T V D K I F Y L L K K I D>  
ACCTTTTCAGACTATTATTATCTGTTTTTAAATAAACATTAACATATTTTCAGAGTGAAAATTTATGAGGCAAAAATATGTTTCAGCCGATTATTTGCCCCTTATTTTTTCGGATATATTA 2280  
T F S D Y Y Y S V F K I N I N I F Q S E N Y E A K I C S A D Y L P L Y F S D I L>  
AGACCATTTATAGTAATAAATAATTACATAAACTAA 2316  
R P F I V I N N Y I N \*>

S1. Map of the piggybac insertion. Knockout of PF3D7\_1305500 was achieved by the insertion of the piggybac cassette at position 199 in the 5' region of the ORF.

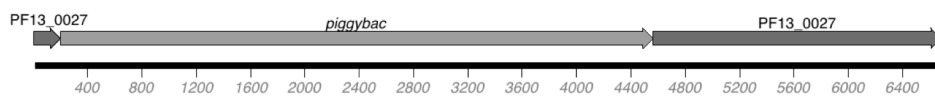

Supplement: EC.00028-13_zek999094145so1.pdf [file EC.00028-13_zek999094145so1.pdf]
